# Supplementary material
Source: PubMed Central journal article supplement (PMC5652607)

## SUPPLEMENTARY DATA

### **Supplementary Figure 1. Blood glucose homeostasis, Pdx1 levels and Pdx1 target gene expression is unaffected in adult *Pdx1*<sup>ΔAIV/ΔAIV</sup> mice.**

(A) Four month-old *Pdx1*<sup>ΔAIV/ΔAIV</sup> mice had fasting blood glucose levels and (B) glucose clearance rates that were indistinguishable from *Pdx1*<sup>+/+</sup> and *Pdx1*<sup>ΔAIV/+</sup> mice. n = 4-11. (C) Representative images illustrating the similar staining pattern for Pdx1, Nkx6.1, MafA and Glut2 in 5 week-old male *Pdx1*<sup>+/+</sup> and *Pdx1*<sup>ΔAIV/ΔAIV</sup> islets. Scale bars: 10μm.

SUPPLEMENTARY DATA

A.

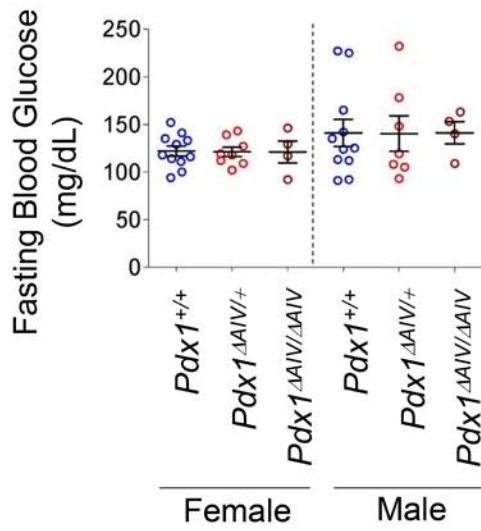

B.

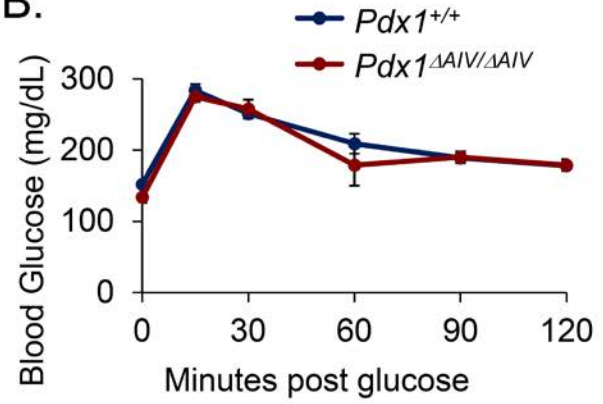

C.

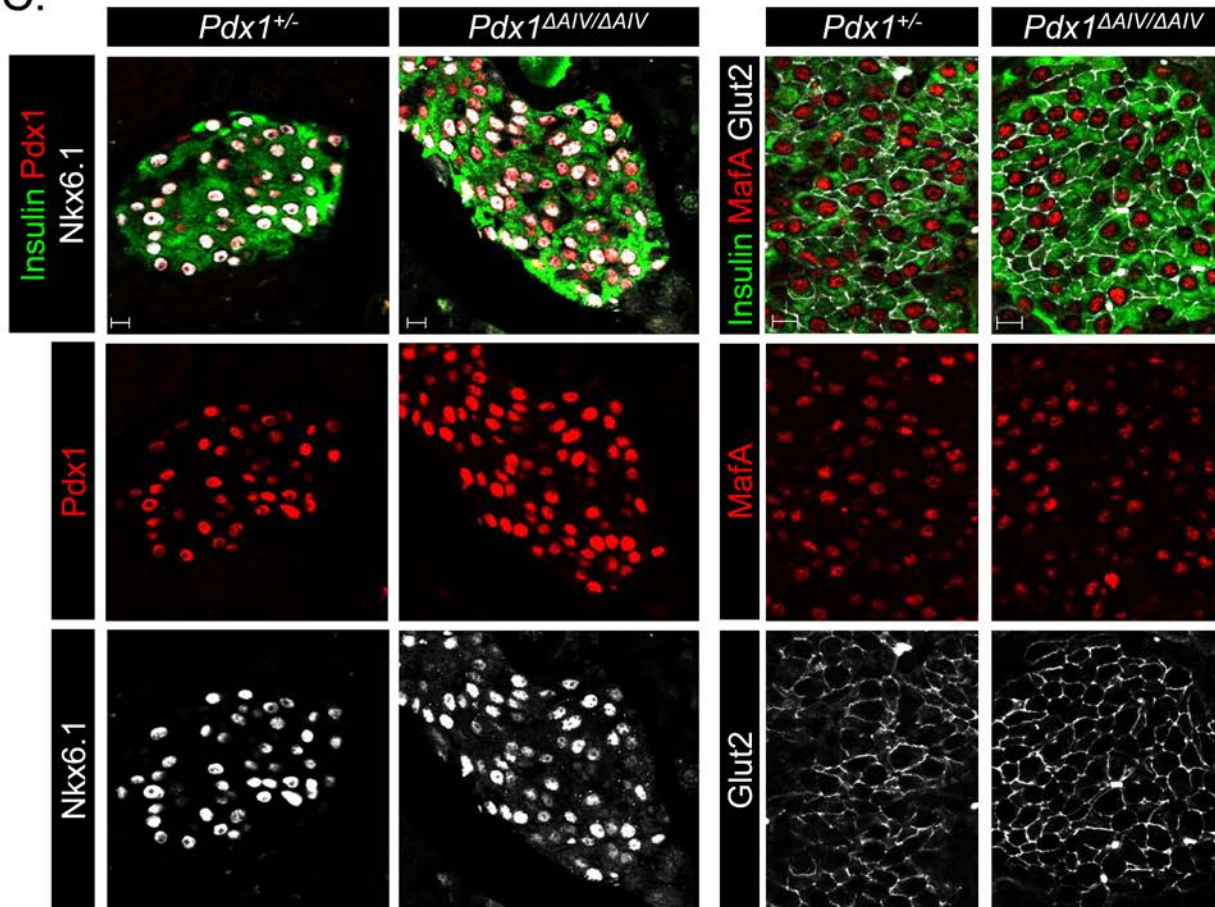

## SUPPLEMENTARY DATA

### **Supplementary Figure 2. *Pdx1*<sup>ΔAIV/-</sup> mice produce slightly fewer hormone<sup>+</sup> cells during development.**

(A) There was no statistical difference in body weight between 3-9 week-old *Pdx1*<sup>+/-</sup> and *Pdx1*<sup>ΔAIV/-</sup> mice. (B) Representative image of Neurogenin 3 (Ngn3), glucagon and insulin staining in E15.5 *Pdx1*<sup>+/-</sup> and *Pdx1*<sup>ΔAIV/-</sup> pancreata. Cell counting revealed a roughly 50% reduction in the number of *Pdx1*<sup>ΔAIV/-</sup> Ngn3<sup>+</sup> cells. Scale bars: 20μm (C) There was a slight, but significant reduction in the number of E18.5 *Pdx1*<sup>ΔAIV/-</sup> insulin<sup>+</sup> (β) and somatostatin<sup>+</sup> (δ) cells, but not glucagon<sup>+</sup> (α) cells. (D) *Pdx1*<sup>ΔAIV/-</sup> Ki67<sup>+</sup> insulin<sup>+</sup> cell and (E) apoptosis levels were unchanged at E18.5. n = 3. \*, p < 0.05. (F) Representative image of insulin and Pdx1 staining in E18.5 *Pdx1*<sup>+/-</sup> and *Pdx1*<sup>ΔAIV/-</sup> pancreata. Scale bars: 10μm.

SUPPLEMENTARY DATA

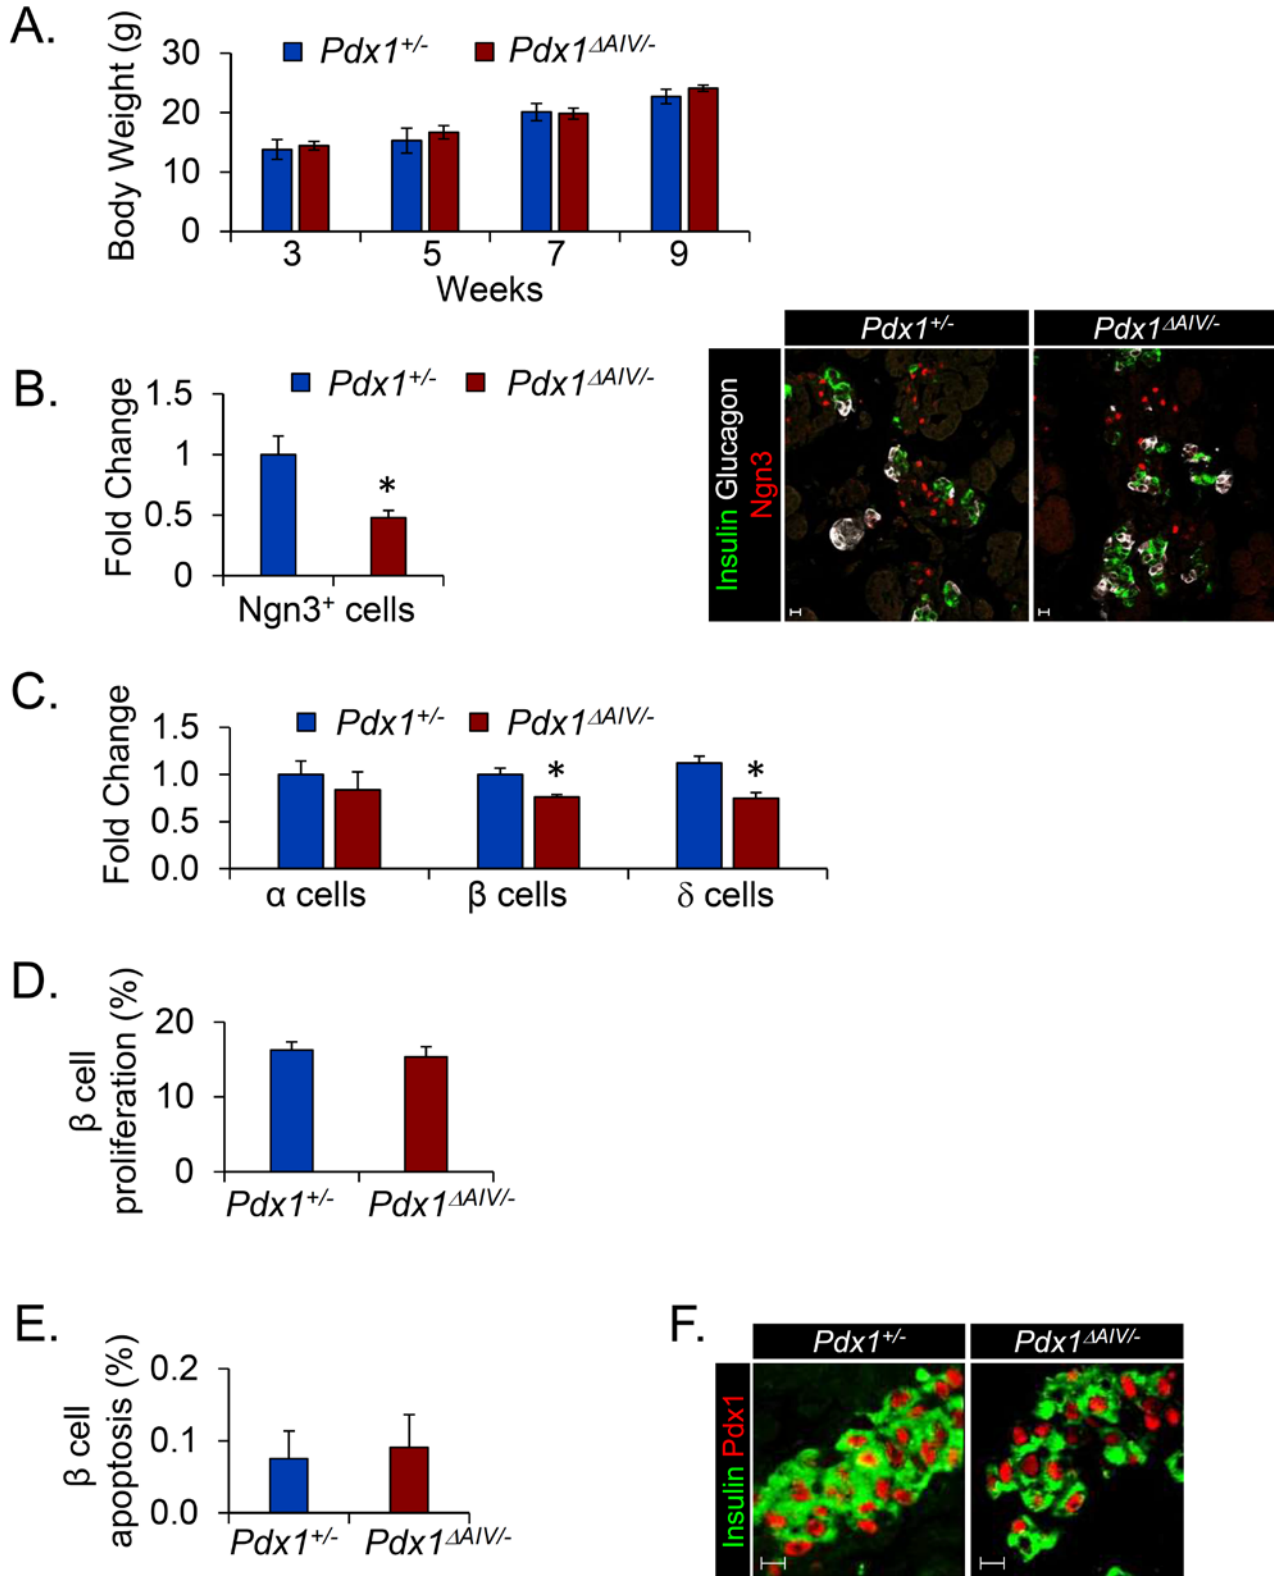

SUPPLEMENTARY DATA

**Supplementary Figure 3. Blood glucose levels and  $\beta$  cell marker staining appears unchanged in P3 *Pdx1* <sup>$\Delta$ AIV/-</sup> pancreata.**

(A) *Pdx1* <sup>$\Delta$ AIV/-</sup> and *Pdx1*<sup>+/-</sup> fed blood glucose levels and (B)  $\beta$  cell marker staining at P3. Scale

SUPPLEMENTARY DATA

A

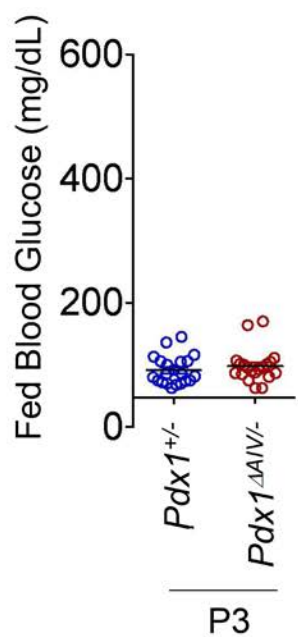

B.

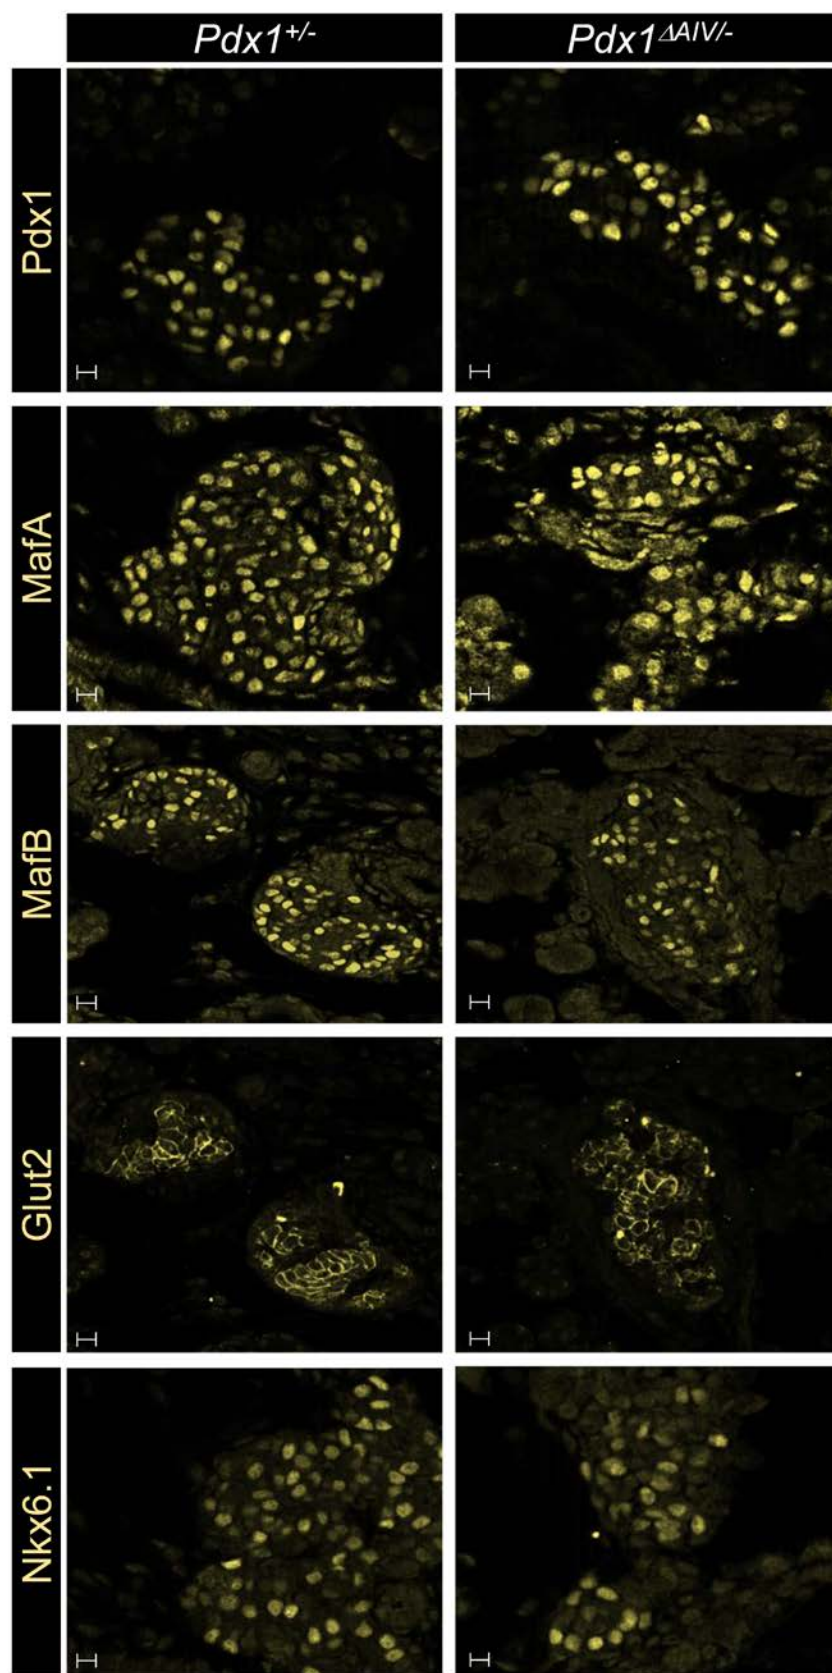

## SUPPLEMENTARY DATA

### **Supplementary Figure 4. Five week-old female *Pdx1*<sup>ΔAIV/-</sup> mice are normoglycemic and have *Pdx1* control-like mRNA levels.**

(A) *Ad lib* fed and fasting blood glucose levels in 5 week-old female *Pdx1*<sup>+/-</sup> and *Pdx1*<sup>ΔAIV/-</sup> mice. n = 4-10. (B) The ability to reduce blood glucose levels was indistinguishable between 5 week-old female *Pdx1*<sup>ΔAIV/-</sup> and *Pdx1*<sup>+/-</sup> mice. n = 5-9. (C) Comparison of the Area Under Curve (AUC) in the glucose tolerance tests performed on the 5 week-old females from (B) and males of Figure 2B. Only male *Pdx1*<sup>ΔAIV/-</sup> mice were glucose intolerant. (D) Levels of *Pdx1* and *Pdx1* bound targets gene expression in 5 week-old male and female *Pdx1*<sup>ΔAIV/-</sup> and *Pdx1*<sup>+/-</sup> islets. The male animals represent a different cohort than described in Figures 3 and 4. Only the male *Pdx1*<sup>ΔAIV/-</sup> animals have deficits. n = 3. \*, p < 0.05; \*\*, p < 0.01.

SUPPLEMENTARY DATA

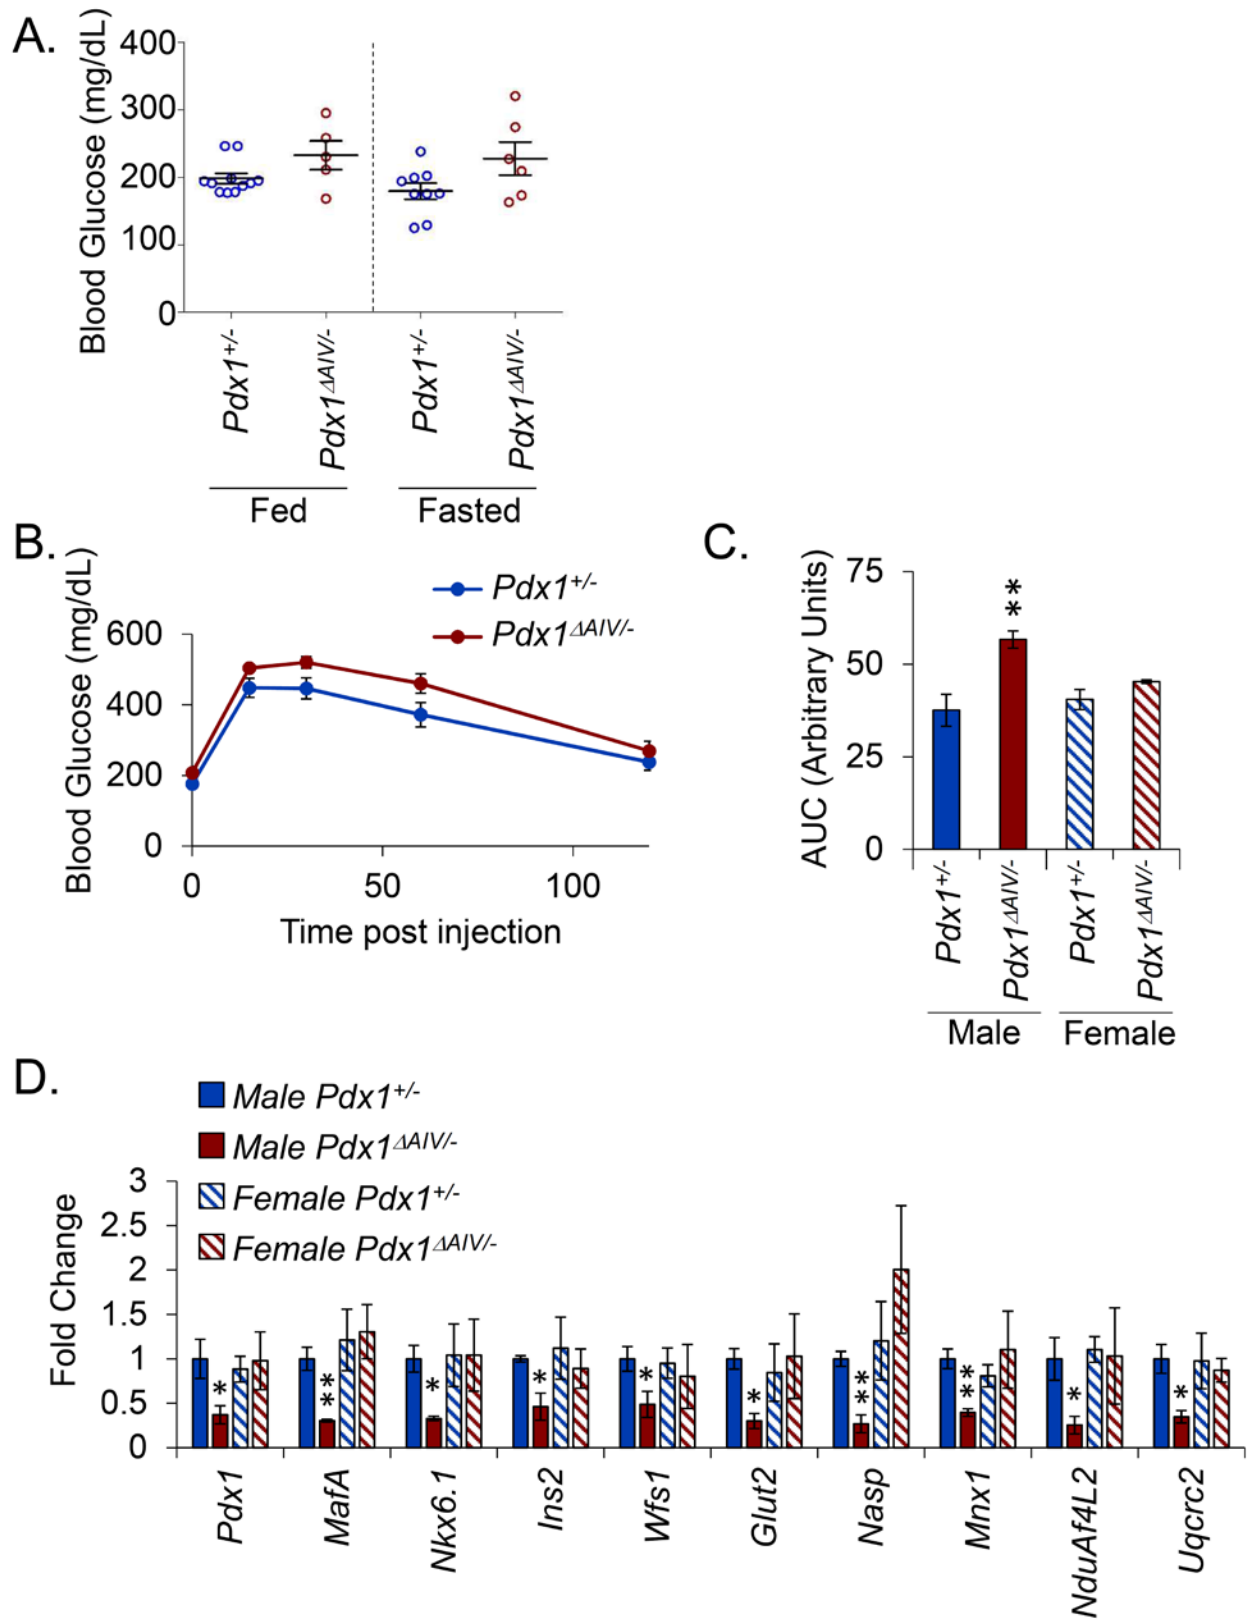



SUPPLEMENTARY DATA

**Supplementary Figure 5. Five week-old female *Pdx1*<sup>ΔAIV/-</sup> mice have normal *Pdx1* and *MafA* levels.** Representative images illustrating the difference in *Pdx1* (A) and *MafA* (B) staining intensity within the β cells of 5 week-old male and female *Pdx1*<sup>ΔAIV/-</sup> islets. Scale bars: 10μm.

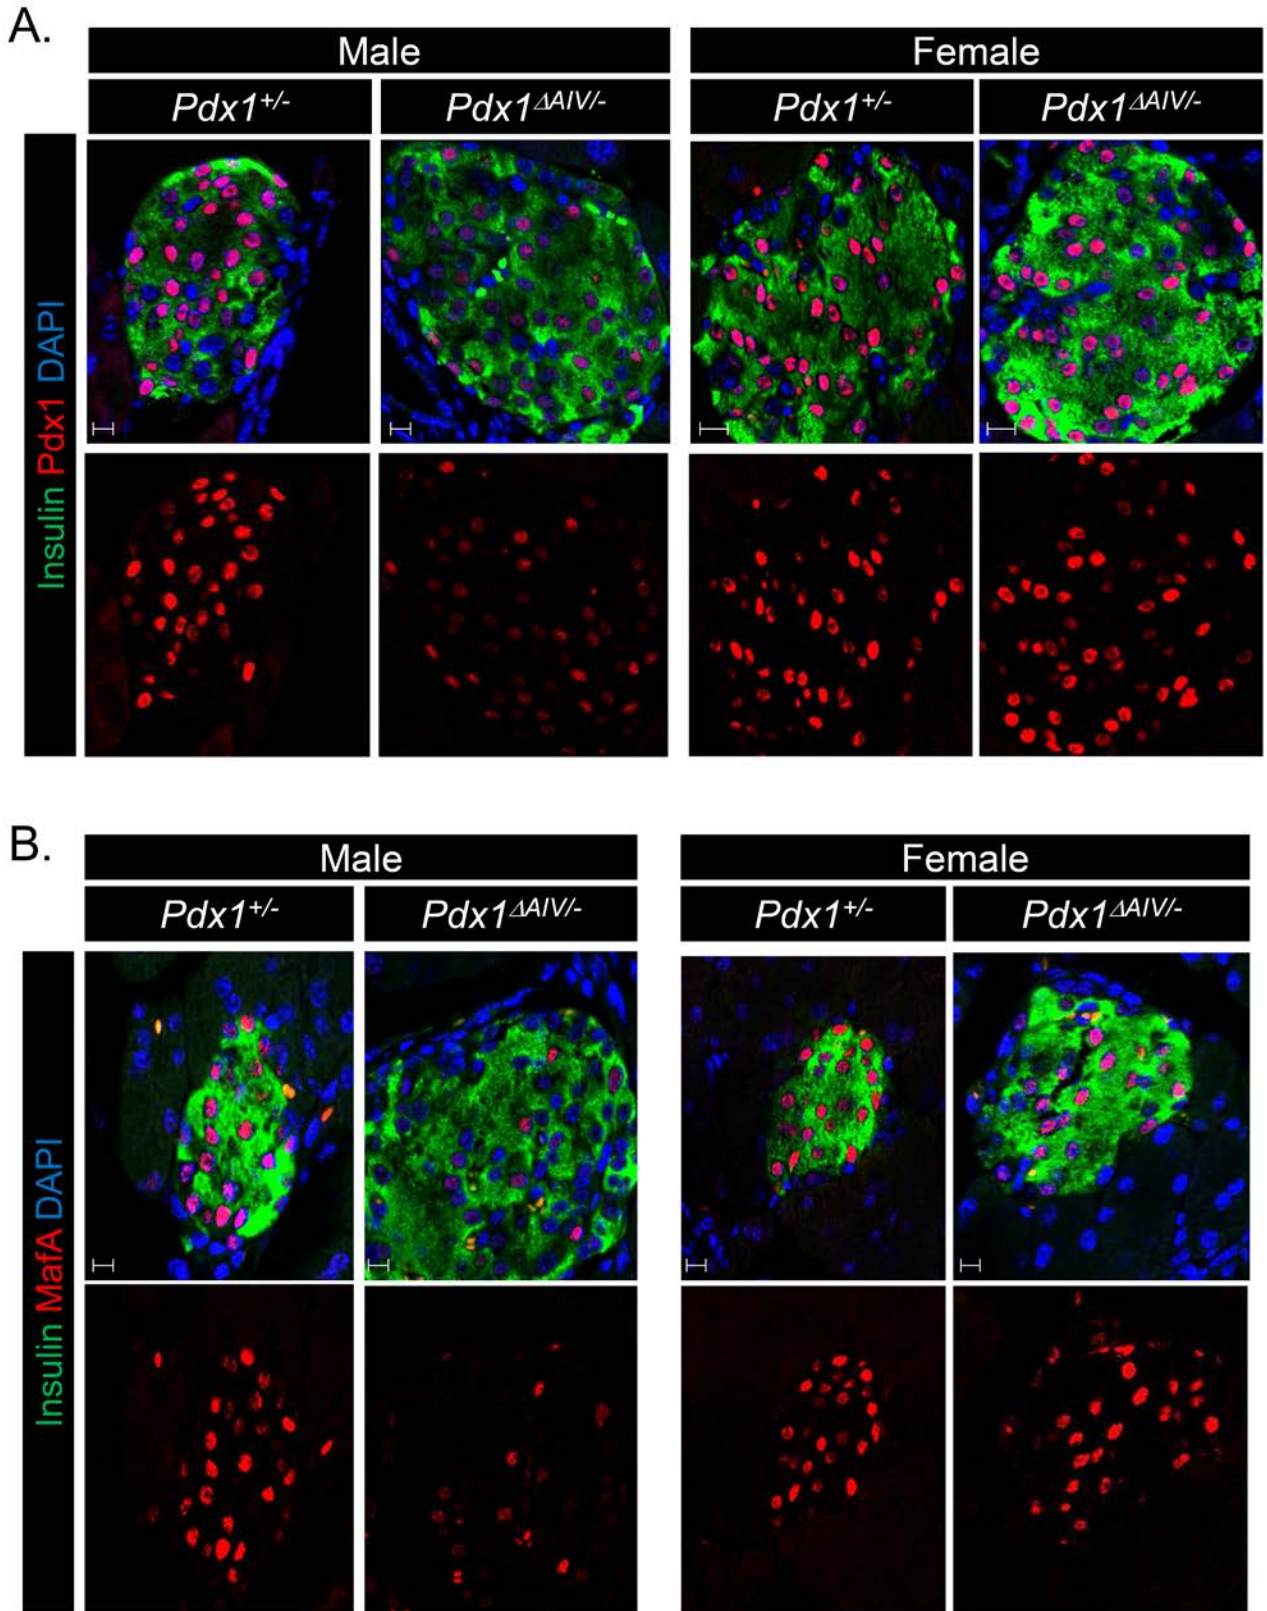

SUPPLEMENTARY DATA

**Supplementary Figure 6. Islet insulin, MafA, Nkx6.1 and Glut2 staining levels are negatively impacted at weaning in male *Pdx1<sup>ΔAIV/-</sup>* mice.** A characteristic image of  $\beta$  cell insulin, MafA, Nkx6.1 and Glut2 levels within 3 and 5 week-old *Pdx1<sup>ΔAIV/-</sup>*, *Pdx1<sup>+/-</sup>*, *Pdx1<sup>ΔAIV/-</sup>*, and *Pdx1<sup>+/-</sup>* islets. Scale bars: 10 $\mu$ m.

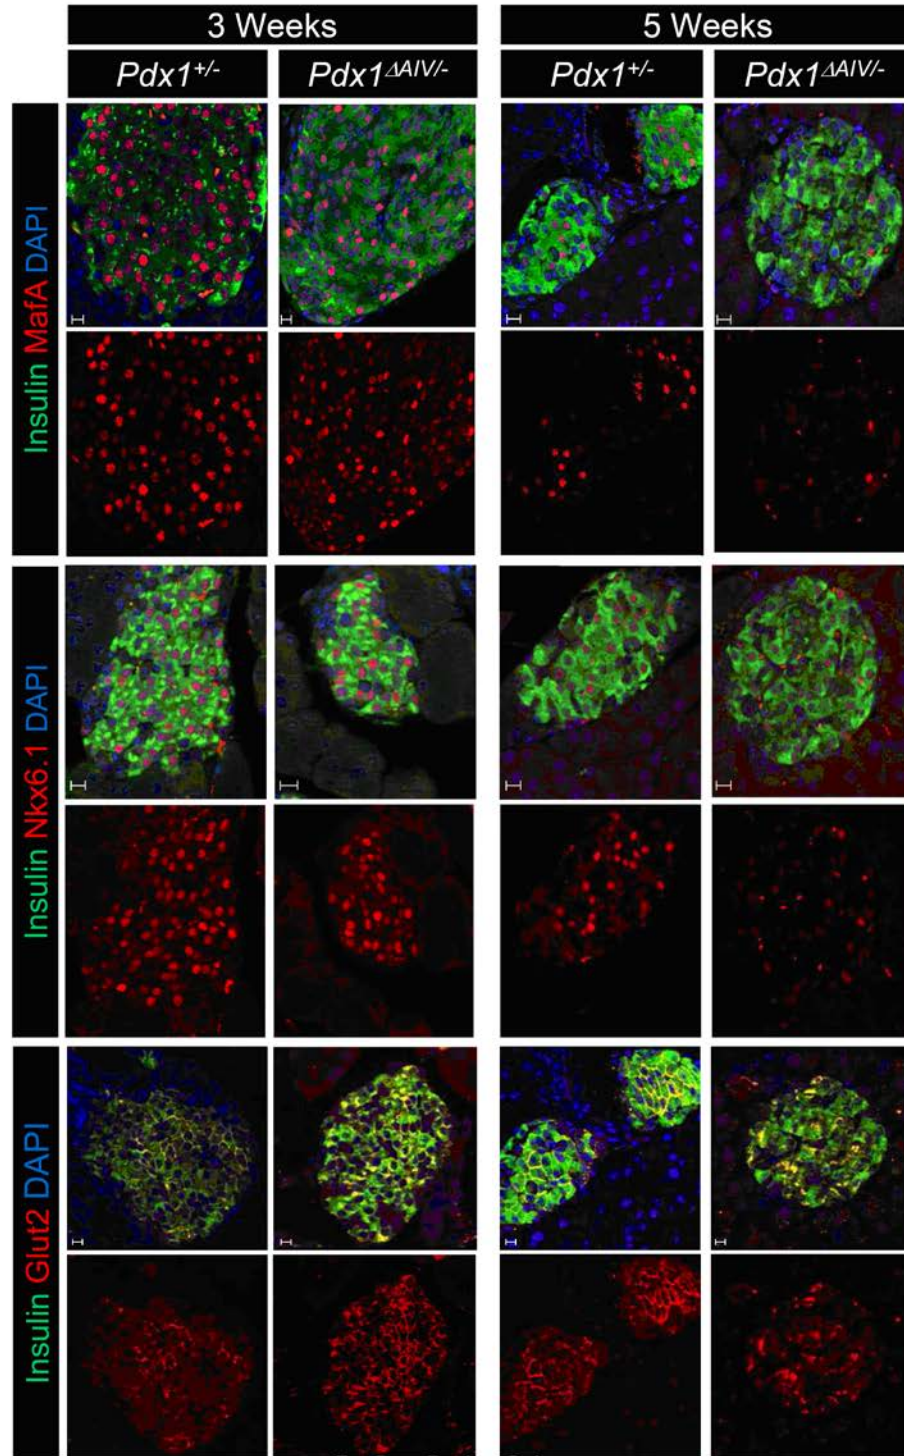

For Peer Review Only

## SUPPLEMENTARY DATA

**Supplementary Figure 7. Analysis of islet enriched transcription factor and cell cycle associated gene expression in male *Pdx1*<sup>ΔAIV/-</sup> islets.** (A) Expression of various islet-enriched transcription factors and (B) cell cycle regulators in 3 and 5 week-old male *Pdx1*<sup>ΔAIV/-</sup> islets. Only the changes in *CyclinB1* (*Ccnb1*) and the Cdk inhibitor, *p19*, were significant. n = 3, \*, *p* < 0.05.

A. 5 Weeks

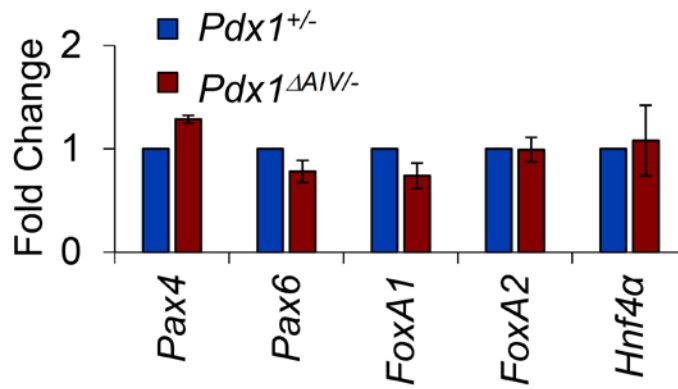

B. 3 Weeks

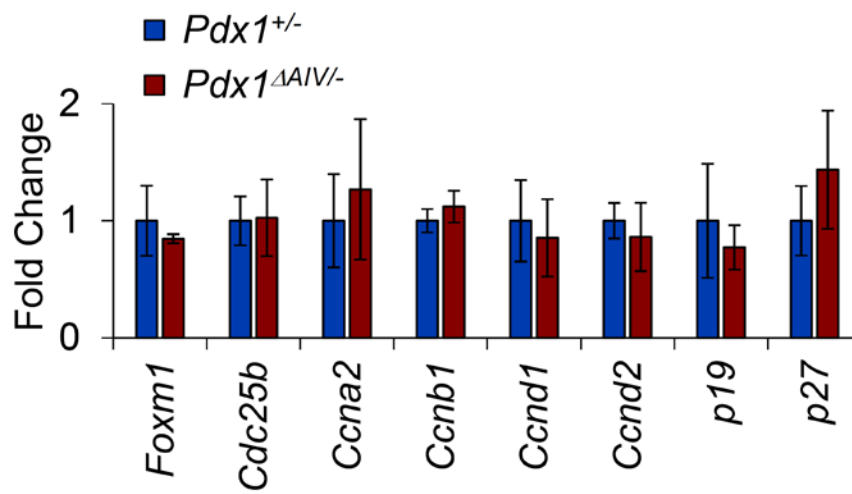

5 Weeks

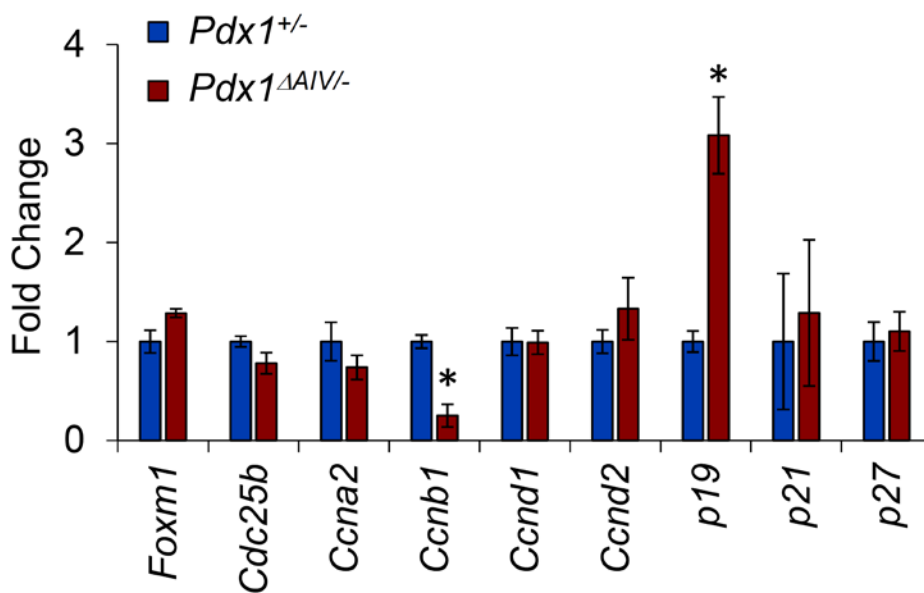

Supplement: DB161516SupplementaryData.pdf [file DB161516SupplementaryData.pdf]
